# Supplementary material for: Circular RNA Transcriptomic Analysis of Primary Human Brain Microvascular Endothelial Cells Infected with Meningitic Escherichia coli
Source: PubMed Central journal article supplement — Mol Ther Nucleic Acids. 2018 Oct 26;13:651–64. doi: 10.1016/j.omtn.2018.10.013 (PMC6258830; doi:10.1016/j.omtn.2018.10.013), 2018-10-26
Supplement: mmc1.pdf [file mmc1.pdf]

OMTN, Volume 13

## Supplemental Information

### **Circular RNA Transcriptomic Analysis of Primary Human Brain Microvascular Endothelial Cells Infected with Meningitic *Escherichia coli***

**Ruicheng Yang, Bojie Xu, Bo Yang, Jiyang Fu, Lu Liu, Nouman Amjad, Aoling Cai, Chen Tan, Huanchun Chen, and Xiangru Wang**

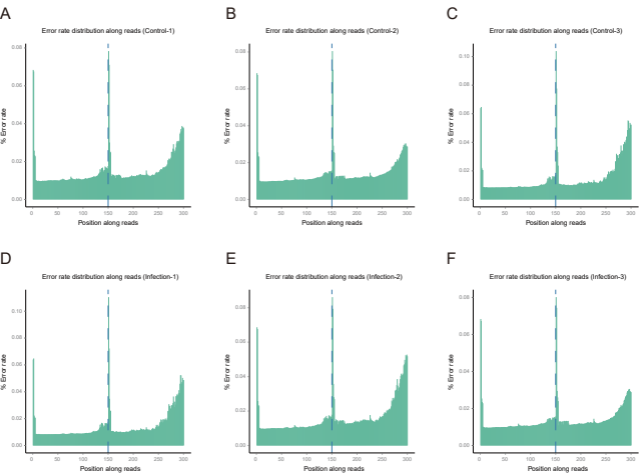

Figure S1. The error rate distribution in each sample

A

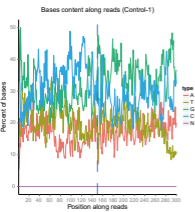

B

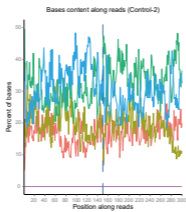

C

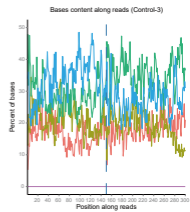

D

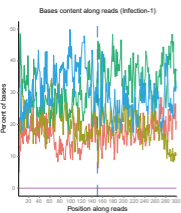

E

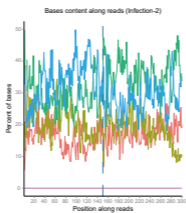

F

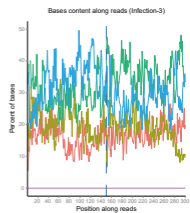

Figure S2. The base content in each sample

A

Classification of Raw Reads (Control-1)

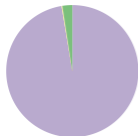

Clean Reads (42335456, 97.38%)  
 Containing N (90787, 0.21%)  
 Low Quality (0.1, 0.00%)  
 Adapter Related (1048943, 2.41%)

B

Classification of Raw Reads (Control-2)

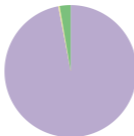

Clean Reads (44811438, 97.01%)  
 Containing N (142816, 0.31%)  
 Low Quality (0.1, 0.00%)  
 Adapter Related (1238462, 2.68%)

C

Classification of Raw Reads (Control-3)

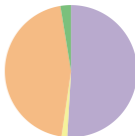

Clean Reads (30519992, 50.91%)  
 Containing N (837704, 1.40%)  
 Low Quality (27041050, 45.11%)  
 Adapter Related (11542290, 2.58%)

D

Classification of Raw Reads (Infection-1)

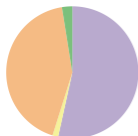

Clean Reads (27121430, 53.45%)  
 Containing N (709407, 1.40%)  
 Low Quality (21625355, 42.62%)  
 Adapter Related (1281691, 2.53%)

E

Classification of Raw Reads (Infection-2)

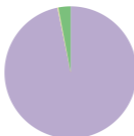

Clean Reads (43476316, 96.80%)  
 Containing N (93817, 0.21%)  
 Low Quality (0.1, 0.00%)  
 Adapter Related (1344024, 2.99%)

F

Classification of Raw Reads (Infection-3)

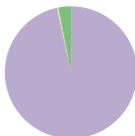

Clean Reads (41596127, 96.61%)  
 Containing N (132028, 0.31%)  
 Low Quality (0.1, 0.00%)  
 Adapter Related (1325368, 3.08%)

Figure S3. the raw read classification in each sample

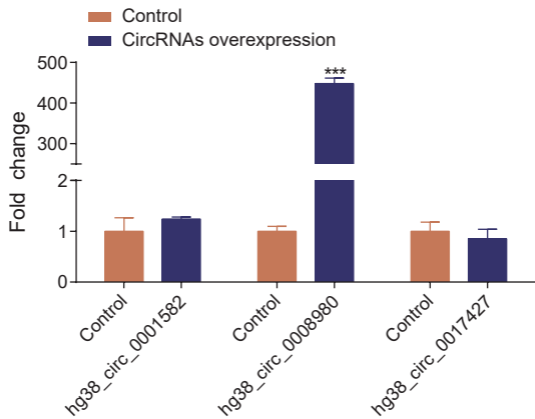

Figure S4. Overexpression of the circRNAs shown in Figure 6B. Data were expressed as the mean  $\pm$  SEM from three independent assays. \*\*\* indicated  $p < 0.001$ .

**Table S1. Quality list of data output**

| Sample        | Raw Reads | Clean Reads | Clean Bases | Error Rate(%) | Q20(%) | Q30(%) | GC Content(%) |
|---------------|-----------|-------------|-------------|---------------|--------|--------|---------------|
| Control-1-1   | 43475186  | 42335456    | 6.35G       | 0.02          | 98.57  | 95.74  | 62.64         |
| Control-1-2   | 43475186  | 42335456    | 6.35G       | 0.03          | 96.11  | 90.74  | 63.4          |
| Control-2-1   | 46192716  | 44811438    | 6.72G       | 0.02          | 98.63  | 95.84  | 63.14         |
| Control-2-2   | 46192716  | 44811438    | 6.72G       | 0.02          | 96.42  | 91.68  | 63.74         |
| Control-3-1   | 59943036  | 30519992    | 4.58G       | 0.02          | 99.44  | 97.97  | 62.01         |
| Control-3-2   | 59943036  | 30519992    | 4.58G       | 0.03          | 97.1   | 90.58  | 62.66         |
| Infection-1-1 | 50737883  | 27121430    | 4.07G       | 0.02          | 99.4   | 97.83  | 62.31         |
| Infection-1-2 | 50737883  | 27121430    | 4.07G       | 0.03          | 97.21  | 90.9   | 63.03         |
| Infection-2-1 | 44914157  | 43476316    | 6.52G       | 0.02          | 98.57  | 95.77  | 63.12         |
| Infection-2-2 | 44914157  | 43476316    | 6.52G       | 0.03          | 94.89  | 88.26  | 63.93         |
| Infection-3-1 | 43053523  | 41596127    | 6.24G       | 0.02          | 98.68  | 95.96  | 63.34         |
| Infection-3-2 | 43053523  | 41596127    | 6.24G       | 0.02          | 96.4   | 91.66  | 63.97         |

**Table S4. Primers used for real-time PCR in this study**

| Primers | Nucleotide sequence (5'-3') | Amplified fragments |
|---------|-----------------------------|---------------------|
| P1      | TGCCAGACTGATTGTCAT          |                     |
| P2      | TCTTCTCATTGATGGATGGA        | hg38_circ_0000395   |
| P3      | ATTAGCCCAGAGTCCTTAT         |                     |
| P4      | GCATAATACAGTCACACCAG        | hg38_circ_0008815   |
| P5      | GACGAGCCTACTTCAAGA          |                     |
| P6      | CAACCTTATCATAGCCATACC       | hg38_circ_0033002   |
| P7      | ACAGCCTCACCATCATT           |                     |
| P8      | TTCAGCAACCAGTTCTCT          | hg38_circ_0014254   |
| P9      | ATAACCTCGGCTGTTTACA         |                     |
| P10     | GCTTCCAGATCCTGACTC          | hg38_circ_0019064   |
| P11     | AGTCACATCTTCTGCTT           |                     |
| P12     | CTGTTGTCATCAATGCCTT         | hg38_circ_0035876   |
| P13     | AGTCAAGAGCCATCTGTAG         |                     |
| P14     | GAAGCCTACAACATTGG           | hg38_circ_0001582   |
| P15     | CTCCACCAGATGTCAGTT          |                     |
| P16     | TACAGGCAGAGGGTATTTG         | hg38_circ_0008980   |
| P17     | CCAGAAGAAGAGGAAGAAGA        |                     |
| P18     | CTCAGTGTTCCAGTCAT           | hg38_circ_0017427   |
| P19     | CTGAACCCTGTAACCTTTCC        |                     |
| P20     | AGACATCTGGCGTTGGTACATA      | ETV1                |
| P21     | TGCCTCCTGCACCACCACT         |                     |
| P22     | CGCCTGCTTCACCACCTTC         | GAPDH               |
